# Supplementary material for: Molecular Survey of Bacterial Communities Associated with Bacterial Chondronecrosis with Osteomyelitis (BCO) in Broilers
Source: PLoS One. 2015 Apr 16;10(4):e0124403. doi: 10.1371/journal.pone.0124403 (PMC4400152; doi:10.1371/journal.pone.0124403)
Supplement: S2 Table — (XLSX) [file pone.0124403.s002.xlsx]

## Sheet: Sheet1
S2 Table. Design of PCR primers
Name	Sequence tag	DNA sequence
Forward primer
V6F01	TGAC	5-AATGATACGGCGACCACCGAGATCTACACTCTTTCCCTACACGACGCTCTTCCGATCT-NNNNNGG-TGAC-TT-CAACGCGARGAACCTTACC-3
V6F02	AGAG	5-AATGATACGGCGACCACCGAGATCTACACTCTTTCCCTACACGACGCTCTTCCGATCT-NNNNNGG-AGAG-TT-CAACGCGARGAACCTTACC-3
V6F03	ATGA	5-AATGATACGGCGACCACCGAGATCTACACTCTTTCCCTACACGACGCTCTTCCGATCT-NNNNNGG-ATGA-TT-CAACGCGARGAACCTTACC-3
V6F04	TGCA	5-AATGATACGGCGACCACCGAGATCTACACTCTTTCCCTACACGACGCTCTTCCGATCT-NNNNNGG-TGCA-TT-CAACGCGARGAACCTTACC-3
V6F05	GCAT	5-AATGATACGGCGACCACCGAGATCTACACTCTTTCCCTACACGACGCTCTTCCGATCT-NNNNNGG-GCAT-TT-CAACGCGARGAACCTTACC-3
V6F06	CGAT	5-AATGATACGGCGACCACCGAGATCTACACTCTTTCCCTACACGACGCTCTTCCGATCT-NNNNNGG-CGAT-TT-CAACGCGARGAACCTTACC-3
V6F07	CTAG	5-AATGATACGGCGACCACCGAGATCTACACTCTTTCCCTACACGACGCTCTTCCGATCT-NNNNNGG-CTAG-TT-CAACGCGARGAACCTTACC-3
V6F08	GATC	5-AATGATACGGCGACCACCGAGATCTACACTCTTTCCCTACACGACGCTCTTCCGATCT-NNNNNGG-GATC-TT-CAACGCGARGAACCTTACC-3
V6F09	TAGC	5-AATGATACGGCGACCACCGAGATCTACACTCTTTCCCTACACGACGCTCTTCCGATCT-NNNNNGG-TAGC-TT-CAACGCGARGAACCTTACC-3
V6F10	GACT	5-AATGATACGGCGACCACCGAGATCTACACTCTTTCCCTACACGACGCTCTTCCGATCT-NNNNNGG-GACT-TT-CAACGCGARGAACCTTACC-3
Reverse primer
V6R01	TGAC	5-CAAGCAGAAGACGGCATACGAGATGTGACTGGAGTTCAGACGTGTGCTCTTCCGATCT-GG-TGAC-TT-ACAACACGAGCTGACGAC-3
V6R02	AGAG	5-CAAGCAGAAGACGGCATACGAGATGTGACTGGAGTTCAGACGTGTGCTCTTCCGATCT-GG-AGAG-TT-ACAACACGAGCTGACGAC-3
V6R03	ATGA	5-CAAGCAGAAGACGGCATACGAGATGTGACTGGAGTTCAGACGTGTGCTCTTCCGATCT-GG-ATGA-TT-ACAACACGAGCTGACGAC-3
V6R04	TGCA	5-CAAGCAGAAGACGGCATACGAGATGTGACTGGAGTTCAGACGTGTGCTCTTCCGATCT-GG-TGCA-TT-ACAACACGAGCTGACGAC-3
V6R05	GCAT	5-CAAGCAGAAGACGGCATACGAGATGTGACTGGAGTTCAGACGTGTGCTCTTCCGATCT-GG-GCAT-TT-ACAACACGAGCTGACGAC-3
V6R06	CGAT	5-CAAGCAGAAGACGGCATACGAGATGTGACTGGAGTTCAGACGTGTGCTCTTCCGATCT-GG-CGAT-TT-ACAACACGAGCTGACGAC-3
V6R07	CTAG	5-CAAGCAGAAGACGGCATACGAGATGTGACTGGAGTTCAGACGTGTGCTCTTCCGATCT-GG-CTAG-TT-ACAACACGAGCTGACGAC-3
V6R08	GATC	5-CAAGCAGAAGACGGCATACGAGATGTGACTGGAGTTCAGACGTGTGCTCTTCCGATCT-GG-GATC-TT-ACAACACGAGCTGACGAC-3
V6R09	TAGC	5-CAAGCAGAAGACGGCATACGAGATGTGACTGGAGTTCAGACGTGTGCTCTTCCGATCT-GG-TAGC-TT-ACAACACGAGCTGACGAC-3
V6R10	GACT	5-CAAGCAGAAGACGGCATACGAGATGTGACTGGAGTTCAGACGTGTGCTCTTCCGATCT-GG-GACT-TT-ACAACACGAGCTGACGAC-3
