# Supplementary material for: Molecular Survey of Bacterial Communities Associated with Bacterial Chondronecrosis with Osteomyelitis (BCO) in Broilers
Source: PLoS One. 2015 Apr 16;10(4):e0124403. doi: 10.1371/journal.pone.0124403 (PMC4400152; doi:10.1371/journal.pone.0124403)
Supplement: S3 Table — (XLSX) [file pone.0124403.s003.xlsx]

## Sheet: Sheet1
S3 Table. Dominant taxonomic groups
Phylum	class	order	family	genus
Actinobacteria (2.6%)	Actinobacteria (2.5%)	Actinobacteriales (2.4%)	Corynebacteriaceae (1.1%)	Corynebacterium (1.0%)
Firmicutes (6.1%)	Bacilli (2.6%)	Bacillales (1.4%)	Staphylococcaceae (1.1%)	Staphylococcus (1.1%)
		Lactobacillales (1.1%)	Lactobacillaceae (0.7%)	Lactobacillus (0.7%)
	Clostridia (3.5%)	Clostridiales (3.5%)	ClostridialesFamilyXI.IncertaeSedis (0.6%)
			Lachnospiraceae (0.9%)
			Ruminococcaceae (1.8%)
Proteobacteria (90.9%)	Gammaproteobacteria (90.5%)	Enterobacteriales (34.2%)	Enterobacteriaceae (34.2%)	Cedecea (13.8%)
				Serratia (14.8%)
		Vibrionales (27%)	Vibrionaceae (27.3%)	Vibrio (19.8%)
				Photobacterium (7.5%)
		Pseudomonadales (15%)	Moraxellaceae (10.7%)	Acinetobacter (10.7%)
			Pseudomonadaceae (3.8%)	Pseudomonas (3.8%)
		Oceanospirillales (7.9%)	Oceanospirillaceae (7.7%)	Nitrincola (3.4%)
		Pasteurellales (4.7%)	Pasteurellaceae (4.7%)	Haemophilus (4.7%)
